# Supplementary material for: Structural Deviation and Identification of Novel Inhibitor of SARS-CoV-2 Spike Protein Through Molecular Docking: An In Silico Study
Source: Preprints.org preprint supplement (doi:10.20944/preprints202004.0282.v1), 2020-04-16
Supplement: Supplementary file 1 [file supplementary]

## Sheet: Sheet1
Structural deviation and identification of novel inhibitor of SARS-CoV-2 spike protein through molecular docking; an insilico study
Supplymentary 1
Table A	Deferoxamine - Furin
Binding Energy	Lignad efficiency	intermol energy	vdw hb desolv energy	electrostatic energy	total internal	torsional energy	unbound energy	ref RMS	cIRMS
1.72	0.04	-6.34	-3.43	-2.91	0.51	8.05	0.51	31.55	0
1.02	0.03	-7.03	-4.57	-2.47	0.53	8.05	0.53	33.22	0
1.3	0.03	-6.75	-4.35	-2.4	0.52	8.05	0.52	25.96	0
-0.76	-0.02	-8.81	-6.65	-2.16	0.48	8.05	0.48	26.97	0
1.02	0.03	-7.03	-5.02	-2.01	0.5	8.05	0.5	32.14	0
-0.58	-0.01	-8.64	-6.43	-2.21	0.49	8.05	0.49	26.71	0.3
1.07	0.03	-6.98	-5.17	-1.81	0.45	8.05	0.45	34.6	0
0.01	0	-8.04	-6.21	-1.83	0.58	8.05	0.58	24.99	0
1.42	0.04	-6.63	-5.58	-1.05	0.51	8.05	0.51	23.12	0
-0.01	0	-8.07	-6.03	-2.04	0.49	8.05	0.49	15.97	0
Table B	Deferoxamine - ACE2
Binding Energy	Lignad efficiency	intermol energy	vdw hb desolv energy	electrostatic energy	total internal	torsional energy	unbound energy	ref RMS	cIRMS
-0.9	-0.02	-8.96	-6.7	-2.26	0.52	8.05	0.52	20.8	1.2
-1.03	-0.03	-9.09	-7.06	-2.03	0.49	8.05	0.49	20.28	0.37
-0.7	-0.02	-8.75	-6.47	-2.28	0.44	8.05	0.44	20.45	0.64
-0.96	-0.02	-9.01	-6.99	-2.02	0.49	8.05	0.49	20.3	0.39
0.27	0.01	-7.79	-5.8	-1.99	0.52	8.05	0.52	12.5	0
-1.16	-0.03	-9.22	-7	-2.22	0.46	8.05	0.46	20.61	1.08
0.23	0.01	-7.83	-5.92	-1.9	0.52	8.05	0.52	17.34	0
-0.79	-0.02	-8.85	-6.37	-2.48	0.46	8.05	0.46	20.44	0.72
-1.67	-0.04	-9.72	-7.15	-2.57	0.46	8.05	0.46	20.37	0
-1.08	-0.03	-9.14	-6.7	-2.44	0.51	8.05	0.51	20.61	0.89
Table C	Dimercaprol - Furin
Binding Energy	Lignad efficiency	intermol energy	vdw hb desolv energy	electrostatic energy	total internal	torsional energy	unbound energy	ref RMS	cIRMS
-1.9	-0.32	-3.39	-3.29	-0.11	-0.41	1.49	-0.41	30.83	0
-1.62	-0.27	-3.11	-3.06	-0.05	-0.73	1.49	-0.73	29.07	0
-1.68	-0.28	-3.17	-3.1	-0.07	-0.71	1.49	-0.71	21.72	0
-1.1	-0.18	-2.6	-2.5	-0.09	-1.32	1.49	-1.32	34.4	0
-1.53	0.26	-3.02	-2.99	-0.03	-1.26	1.49	-1.26	38.26	0
-1.82	-0.3	-3.31	-3.16	-0.15	-0.8	1.49	-0.8	31.15	0
-1.75	-0.29	-3.24	-3.1	-0.14	-0.78	1.49	-0.78	29.17	0
-1.61	-0.27	-3.1	-2.82	-0.28	-0.73	1.49	-0.73	18.49	0
-1.07	-0.18	-2.56	-2.49	-0.07	-1.2	1.49	-1.2	9.34	0
-1.5	-0.25	-2.99	-2.84	-0.15	-1.34	1.49	-1.34	19.72	0
Table D	Dimercaprol - ACE2
Binding Energy	Lignad efficiency	intermol energy	vdw hb desolv energy	electrostatic energy	total internal	torsional energy	unbound energy	ref RMS	cIRMS
-2.68	-0.45	-4.17	-4.1	-0.07	-0.7	1.49	-0.7	26.8	1.85
-1.97	-0.33	-3.46	-3.08	-0.38	-0.82	1.49	-0.82	24.19	0
-1.89	-0.32	-3.38	-3.24	-0.14	-0.8	1.49	-0.8	11.04	0
-2.71	-0.45	-4.2	-3.98	-0.23	-0.68	1.49	-0.68	22.93	0
-2.01	-0.34	-3.5	-3.39	-0.1	-0.68	1.49	-0.68	15.76	0
-2.04	-0.34	-3.53	-3.2	-0.33	-1.26	1.49	-1.26	23.07	1.04
-1.57	-0.26	-3.06	-2.86	-0.2	-0.9	1.49	-0.9	23.01	1.66
-3.41	-0.57	-4.9	-4.73	-0.18	-0.74	1.49	-0.74	26.02	0
-3.18	-0.53	-4.67	-4.54	-0.13	-0.01	1.49	-0.01	27.07	0
-1.4	-0.23	-2.89	-2.67	-0.21	-0.82	1.49	-0.82	13.16	0
Table E	Edetate calcium disodium - Furin
Binding Energy	Lignad efficiency	intermol energy	vdw hb desolv energy	electrostatic energy	total internal	torsional energy	unbound energy	ref RMS	cIRMS
1.12	0.06	-3.36	-2.07	-1.29	-0.25	4.47	-0.25	12.67	0
1.14	0.06	-3.33	-1.69	-1.64	-0.56	4.47	-0.56	13.9	0.68
1.24	0.06	-3.24	-2.15	-1.08	-0.52	4.47	-0.52	10.05	0
1.19	0.06	-3.28	-1.68	-1.6	-0.35	4.47	-0.35	12.01	1.01
1.05	0.05	-3.43	-2.76	-0.67	-0.32	4.47	-0.32	8.14	0.3
1.18	0.06	-3.3	-1.58	-1.72	-0.53	4.47	-0.53	12.06	1.48
1.03	0.05	-3.44	-1.83	-1.61	-0.33	4.47	-0.33	13.77	0
1.04	0.05	-3.44	-2.73	-0.7	-0.32	4.47	-0.32	8.17	0
0.98	0.05	-3.5	-1.66	-1.83	-0.38	4.47	-0.38	12.17	0
1.27	0.06	-3.2	-1.28	-1.92	-0.35	4.47	-0.35	12.76	1.16
Table F	Edetate calcium disodium - ACE2
Binding Energy	Lignad efficiency	intermol energy	vdw hb desolv energy	electrostatic energy	total internal	torsional energy	unbound energy	ref RMS	cIRMS
1.06	0.05	-3.41	-2.31	-1.1	-0.29	4.47	-0.29	22.63	1.91
0.83	0.04	-3.64	-1.95	1.69	-0.33	4.47	-0.33	23.98	0
2.1	0.11	-2.37	-2	-0.37	-0.45	4.47	-0.45	11.83	0
0.92	0.05	-3.56	-2.47	-1.08	-0.21	4.47	-0.21	22.12	1.55
0.56	0.03	-3.92	-2.21	-1.71	-0.32	4.47	-0.32	25.55	0
0.72	0.04	-3.75	-2.62	-1.13	-0.34	4.47	-0.34	22.22	0
1	0.05	-3.48	-2.36	-1.12	-0.29	4.47	-0.29	27.24	0
0.65	0.03	-3.82	-2.23	-1.59	-0.5	4.47	-0.5	25.69	0
1.02	0.05	-3.46	-1.43	-2.03	-0.33	4.47	-0.33	26.55	0
1.57	0.08	-2.9	-2.44	-0.46	-0.27	4.47	-0.27	9.15	0
Table G	Penicillamine - Furin
Binding Energy	Lignad efficiency	intermol energy	vdw hb desolv energy	electrostatic energy	total internal	torsional energy	unbound energy	ref RMS	cIRMS
-2.97	-0.33	-4.46	-3.07	-1.39	-2.03	1.49	-2.03	18.3	0
-2.42	-0.27	-3.91	-2.57	-1.34	-2.2	1.49	-2.2	31.11	0
-2.25	-0.25	-3.74	-1.47	-2.27	-2.24	1.49	-2.24	40.04	0
-3.24	-0.36	-4.74	-2.64	-2.09	-1.7	1.49	-1.7	18.91	1.88
-1.8	-0.2	-3.29	-1.91	-1.37	-1.96	1.49	-1.96	33.02	0
-3.46	-0.38	-4.95	-3.29	-1.66	-1.74	1.49	-1.74	18.79	0
-2.79	-0.31	-4.28	-2.43	-1.86	-2.19	1.49	-2.19	18.69	1.83
-2.23	-0.25	-3.72	-2.06	-1.66	-1.88	1.49	-1.88	35	0
-3.05	-0.34	-4.54	-2.73	-1.81	-2.16	1.49	-2.16	18.9	1.8
-3.1	-0.34	-4.59	-2.39	-2.2	-1.74	1.49	-1.74	38.93	0
Table H	Penicillamine - ACE2
Binding Energy	Lignad efficiency	intermol energy	vdw hb desolv energy	electrostatic energy	total internal	torsional energy	unbound energy	ref RMS	cIRMS
-2.79	-0.31	9.07	-2.24	-2.03	-1.69	1.49	-1.69	12.31	0
-3.02	-0.34	6.13	-3.44	-1.07	-1.69	1.49	-1.69	29.73	0
-2.7	-0.3	-4.19	-3	-1.2	-2.22	1.49	-2.22	10.58	0
-2.55	-0.28	-4.04	-2.76	-1.28	-2.25	1.49	-2.25	31.74	1.62
-2.45	-0.27	-3.95	-1.98	-1.97	-2.12	1.49	-2.12	26.14	0
-3.51	-0.39	-5	-3.45	-1.55	-1.74	1.49	-1.74	25.03	0
-2.36	-0.26	-3.85	-2.55	-1.3	-2.26	1.49	-2.26	32.14	0
-2.64	-0.29	-4.13	-3.16	-0.96	-2.13	1.49	-2.13	10.66	0.87
-2.89	-0.32	-4.38	-3.11	-1.28	-1.78	1.49	-1.78	31.62	0
-3.18	-0.35	-4.67	-3.89	-0.78	-2.24	1.49	-2.24	26.15	0
Table I	Succimer - Furin
Binding Energy	Lignad efficiency	intermol energy	vdw hb desolv energy	electrostatic energy	total internal	torsional energy	unbound energy	ref RMS	cIRMS
-0.5	-0.05	-2.59	-1.21	-1.38	-1.73	2.09	-1.73	10.09	2
-1.63	-0.16	-3.72	-1.85	-1.86	-0.96	2.09	-0.96	13.96	1.35
-1.91	-0.19	39.89	-2.18	-1.82	-0.52	2.09	-0.52	13.95	0
-0.9	-0.09	-2.98	-0.59	-2.39	-1.2	2.09	-1.2	13.62	0
-0.29	-0.03	-2.38	-0.48	-1.9	-1.64	2.09	-1.64	11.47	0
-1.1	-0.11	-3.19	-2.05	-1.14	-0.89	2.09	-0.89	14.54	1.98
-0.56	-0.06	-2.64	-1.23	-1.41	-1.38	2.09	-1.38	10.41	1.82
-1.42	-0.14	-3.51	-1.8	-1.71	-1.34	2.09	-1.34	13.72	1
-1.04	-0.1	-3.12	-1.58	-1.54	-1.26	2.09	-1.26	10.59	0
-1.81	-0.18	-3.9	-2.55	-1.35	-0.9	2.09	-0.9	12.55	0
Table J	Succimer - ACE2
Binding Energy	Lignad efficiency	intermol energy	vdw hb desolv energy	electrostatic energy	total internal	torsional energy	unbound energy	ref RMS	cIRMS
-1.87	-0.19	-3.96	-1.45	-2.51	-1.31	2.09	-1.31	26.73	1.89
-0.51	-0.05	-2.6	-1.33	-1.26	-1.2	2.09	-1.2	25.69	0
-1.2	-0.12	-3.29	-2.68	-0.61	-0.21	2.09	-0.21	30.56	0
-2.63	-0.26	-4.72	-2.5	-2.22	-0.49	2.09	-0.49	25.5	0
-1.39	-0.14	-3.47	-1.43	-2.05	-1.06	2.09	-1.06	26.82	1.82
-0.61	-0.06	-2.7	-1.27	-1.43	-1.36	2.09	-1.36	27.5	0
-1.55	-0.16	-3.64	-3.01	-0.62	-1.22	2.09	-1.22	10.46	0
-1.41	-0.14	-3.5	-2.84	-0.65	-0.48	2.09	-0.48	12.12	0
-1.35	-0.14	-3.44	-1.44	-2	-1.38	2.09	-1.38	27	0
-0.99	-0.1	-3.08	-2.35	-0.73	-1.2	2.09	-1.2	11.68	1.36
